# Supplementary material for: External validation of a refined four-stratum risk assessment score from the French pulmonary hypertension registry
Source: PubMed Central journal article supplement — Eur Respir J. 2022 Jun 30;59(6):2102419. doi: 10.1183/13993003.02419-2021 (PMC9245192; doi:10.1183/13993003.02419-2021), 2022-06-30
Supplement: ERJ-02419-2021.Shareable.pdf [file ERJ-02419-2021.Shareable.pdf]

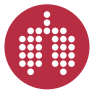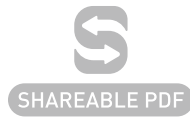

# External validation of a refined four-stratum risk assessment score from the French pulmonary hypertension registry

Athénaïs Boucly <sup>1,2,3,13</sup>, Jason Weatherald <sup>4,13</sup>, Laurent Savale <sup>1,2,3</sup>, Pascal de Groot<sup>5</sup>, Vincent Cottin <sup>6</sup>, Grégoire Prévot<sup>7</sup>, Ari Chaouat <sup>8</sup>, François Picard<sup>9</sup>, Delphine Horeau-Langlard<sup>10</sup>, Arnaud Bourdin <sup>11</sup>, Etienne-Marie Jutant <sup>1,2,3,12</sup>, Antoine Beurnier <sup>1,2,3</sup>, Mitja Jevnikar<sup>1,2,3</sup>, Xavier Jaïs<sup>1,2,3</sup>, Gérald Simonneau<sup>1,2,3</sup>, David Montani <sup>1,2,3</sup>, Olivier Sitbon <sup>1,2,3,14</sup> and Marc Humbert <sup>1,2,3,14</sup>

<sup>1</sup>Université Paris-Saclay, School of Medicine, Le Kremlin-Bicêtre, France. <sup>2</sup>Dept of Respiratory and Intensive Care Medicine, AP-HP, Hôpital Bicêtre, Le Kremlin-Bicêtre, France. <sup>3</sup>INSERM UMR\_S 999, Hôpital Marie Lannelongue, Le Plessis-Robinson, France. <sup>4</sup>University of Calgary, Dept of Medicine, Division of Respirology, and Libin Cardiovascular Institute, Calgary, AB, Canada. <sup>5</sup>Université de Lille, Service de Cardiologie, CHU Lille, Institut Pasteur de Lille, Inserm U1167, Lille, France. <sup>6</sup>Université Lyon 1, INRAE, UMR754, IVPC, National Reference Centre for Rare Pulmonary Diseases, Hospices Civils de Lyon, Lyon, France. <sup>7</sup>CHU de Toulouse, Hôpital Larrey, Service de Pneumologie, Toulouse, France. <sup>8</sup>Inserm UMR\_S1116, Faculté de Médecine de Nancy, Université de Lorraine, Département de Pneumologie, CHRU de Nancy, Vandoeuvre-lès-Nancy, France. <sup>9</sup>Université Bordeaux, Hôpital Cardiologique du Haut-Lévêque, Heart Failure Unit and Pulmonary Hypertension Expert Centre, Bordeaux, France. <sup>10</sup>CHU de Nantes, Hôpital Laënnec, Service de Pneumologie, Nantes, France. <sup>11</sup>Université Montpellier, CHU Montpellier, Dept of Respiratory Diseases, Montpellier, France. <sup>12</sup>CHU Poitiers, Service de Pneumologie, Poitiers, France. <sup>13</sup>Both authors contributed equally. <sup>14</sup>Both authors contributed equally.

Corresponding author: Marc Humbert ([marc.humbert@aphp.fr](mailto:marc.humbert@aphp.fr))

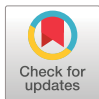

Shareable abstract (@ERSpublications)

**A four-stratum risk assessment method with low, intermediate-low, intermediate-high and high risk categories was better at discriminating survival in pulmonary arterial hypertension than a three-stratum method with low, intermediate and high risk groups** <https://bit.ly/3mA6kj7>

**Cite this article as:** Boucly A, Weatherald J, Savale L, *et al.* External validation of a refined four-stratum risk assessment score from the French pulmonary hypertension registry. *Eur Respir J* 2022; 59: 2102419 [DOI: 10.1183/13993003.02419-2021].

This single-page version can be shared freely online.

Copyright ©The authors 2022.

This version is distributed under the terms of the Creative Commons Attribution Non-Commercial Licence 4.0. For commercial reproduction rights and permissions contact [permissions@ersnet.org](mailto:permissions@ersnet.org)

Received: 6 Sept 2021  
Accepted: 28 Oct 2021

## Abstract

**Introduction** Contemporary risk assessment tools categorise patients with pulmonary arterial hypertension (PAH) as low, intermediate or high risk. A minority of patients achieve low risk status with most remaining intermediate risk. Our aim was to validate a four-stratum risk assessment approach categorising patients as low, intermediate-low, intermediate-high or high risk, as proposed by the Comparative, Prospective Registry of Newly Initiated Therapies for Pulmonary Hypertension (COMPERA) investigators.

**Methods** We evaluated incident patients from the French PAH Registry and applied a four-stratum risk method at baseline and at first reassessment. We applied refined cut-points for three variables: World Health Organization functional class, 6-min walk distance and N-terminal pro-brain natriuretic peptide. We used Kaplan–Meier survival analyses and Cox proportional hazards regression to assess survival according to three-stratum and four-stratum risk approaches.

**Results** At baseline (n=2879), the four-stratum approach identified four distinct risk groups and performed slightly better than a three-stratum method for predicting mortality. Four-stratum model discrimination was significantly higher than the three-stratum method when applied during follow-up and refined risk categories among subgroups with idiopathic PAH, connective tissue disease-associated PAH, congenital heart disease and portopulmonary hypertension. Using the four-stratum approach, 53% of patients changed risk category from baseline compared to 39% of patients when applying the three-stratum approach. Those who achieved or maintained a low risk status had the best survival, whereas there were more nuanced differences in survival for patients who were intermediate-low and intermediate-high risk.

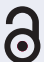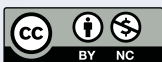

**Conclusions** The four-stratum risk assessment method refined risk prediction, especially within the intermediate risk category of patients, performed better at predicting survival and was more sensitive to change than the three-stratum approach.
